# Supplementary material
Source: Springer Nature journal article supplement (https://www.springermedizin.de/resource/supplementary/12893_2014_515_MOESM4_ESM.pdf/9512620)

# Fistula

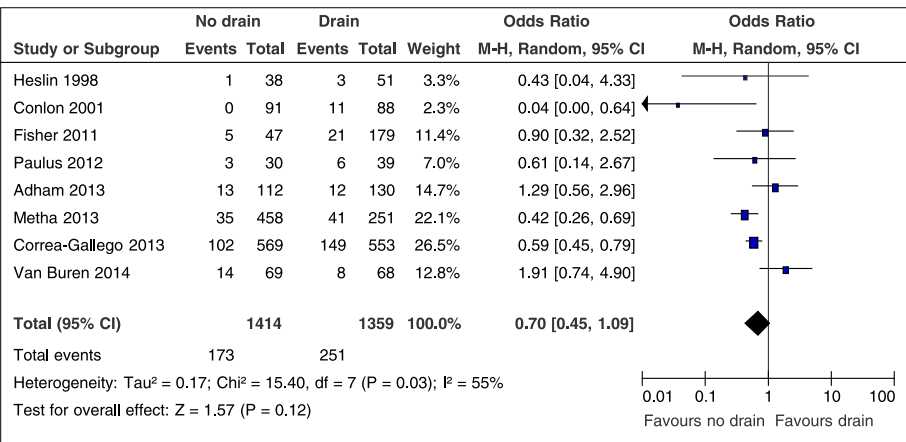

# Abscess

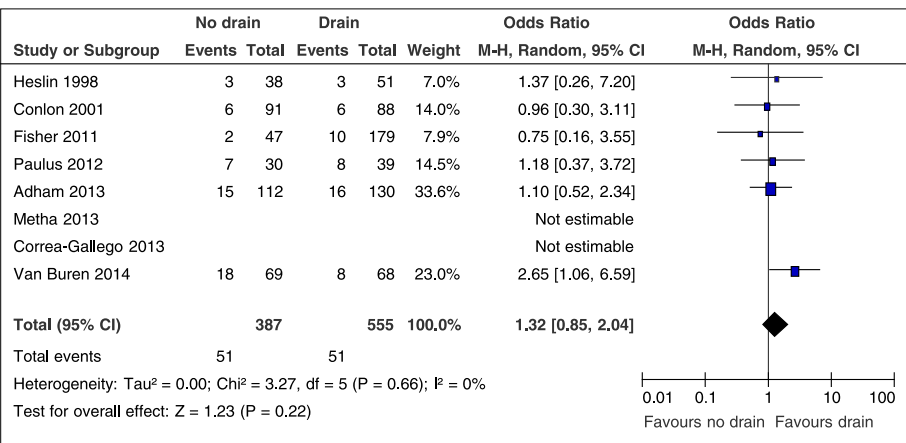

# Interventional radiology procedures

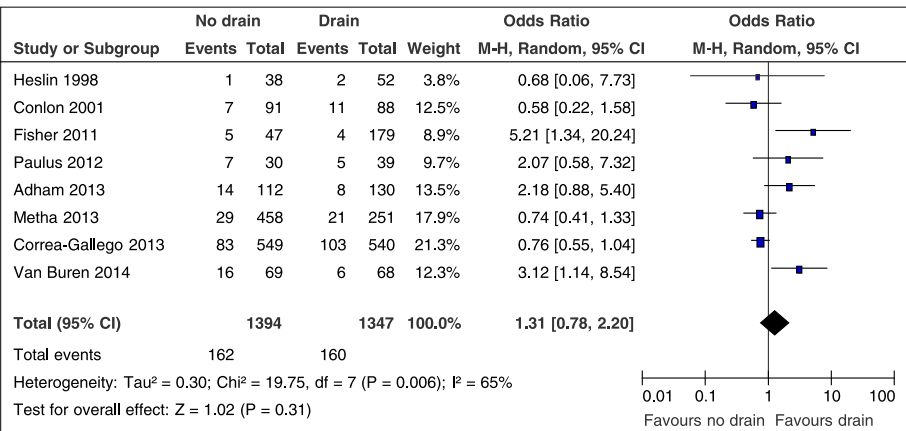

Supplement: MOESM4 [file 9512620]
